# Supplementary material for: Mitigation of Aflatoxin B1 Hepatoxicity by Dietary Hedyotis diffusa Is Associated with Activation of NRF2/ARE Signaling in Chicks
Source: MDPI journal article supplement (doi:10.3390/antiox10060878), 2021-05-30
Supplement: s1 [file s1]

**Table S1.** Basal diet formulation and nutritional values

| Ingredients                 | Percentage (%) | Nutrition component          | Content |
|-----------------------------|----------------|------------------------------|---------|
| Corn                        | 58.2           | Crude protein (%)            | 20.3    |
| Wheat bran                  | 2.0            | Metabolizable energy (MJ/kg) | 12.3    |
| Soybean meal                | 30.0           | Calcium (%)                  | 1.0     |
| Soybean oil                 | 2.5            | Available phosphorus (%)     | 0.43    |
| Cottonseed meal             | 3.0            | Methione (%)                 | 0.60    |
| CaCO <sub>3</sub>           | 1.0            | Methione+cystine (%)         | 0.90    |
| CaHPO <sub>4</sub>          | 2.0            | Lysine (%)                   | 1.10    |
| Salt                        | 0.3            | Tryptophan (%)               | 0.22    |
| L-Lysine (%)                | 0.15           | Threonine (%)                | 0.69    |
| DL-Methione (%)             | 0.3            |                              |         |
| Choline chloride            | 0.2            |                              |         |
| Vitamin premix <sup>1</sup> | 0.05           |                              |         |
| Mineral premix <sup>2</sup> | 0.3            |                              |         |

<sup>1</sup>Vitamin premix provided per kg of diet: retinyl acetate, 10280 IU; cholecalciferol 2280 IU; dl- $\alpha$ -tocopheryl acetate, 17.12 mg; menadione, 6.82 mg; thiamin, 2.28 mg; riboflavin, 5.68 mg; pantothenic acid, 12.25 mg; pyridoxine, 2.28 mg; niacin, 22.84 mg; biotin, 0.18 mg; folic acid, 1.12 mg.

<sup>2</sup>Mineral premix provided per kg of diet: iron, 100 mg; copper, 8 mg; manganese, 20 mg; zinc, 100 mg; iodine, 0.7 mg.

**Table S2.** List of primers used for Q-PCR analysis<sup>1</sup>

|                | Forward primer (5' to 3' direction) | Reverse primer (5' to 3' direction) |
|----------------|-------------------------------------|-------------------------------------|
| <i>NRF2</i>    | ACGCTTTCTTCAGGGGTAGC                | GTTCGGTGCAGAAGAGGTGA                |
| <i>NQO1</i>    | CGCACCTGAGAAAACCTCT                 | AAGCACTCGGGGTTCTTGAG                |
| <i>HO1</i>     | GTCGTTGGCAAGAAGCATCC                | GGGCCTTTTGGGCGATTTTC                |
| <i>GCLC</i>    | GGACGCTATGGGGTTTGAA                 | AGGCCATCACAATGGGACAG                |
| <i>GSTA2</i>   | GATGGAGTCAATTCGGTGGC                | GCACCATCTTCATCCCATCG                |
| <i>GSTA3</i>   | CACTATGCCAACACACGAGG                | GGGCTCTCTCCTTCAGATCC                |
| <i>β-actin</i> | ACCCCAAAGCCAACAGAG                  | CCAGAGTCCATCACAATACCAG              |

<sup>1</sup>*GCLC*, glutamate-cysteine ligase catalytic subunit; *GSTA2*, glutathione S-transferase alpha 2; *GSTA3*, glutathione S-transferase alpha 3; *HO1*, heme Oxygenase-1; *NQO1*, NAD(P)H: quinone oxidoreductase-1; *NRF2*, nuclear factor erythroid-2 related factor 2.

**Table S3.** Name, type, dilution, and source of primary antibodies<sup>1</sup>

| Antibody              | Isotype          | Dilution | Source                  |
|-----------------------|------------------|----------|-------------------------|
| Primary Antibody      |                  |          |                         |
| NRF2                  | Rabbit           | 1:1000   | ABclonal (Wuhan, China) |
| NQO1                  | Rabbit           | 1:1000   | ABclonal (Wuhan, China) |
| HO1                   | Rabbit           | 1:1000   | ABclonal (Wuhan, China) |
| GCLC                  | Rabbit           | 1:1000   | ABclonal (Wuhan, China) |
| GSTA2                 | Rabbit           | 1:1000   | ABclonal (Wuhan, China) |
| GSTA3                 | Rabbit           | 1:1000   | ABclonal (Wuhan, China) |
| β-actin               | Rabbit           | 1:10000  | ABclonal (Wuhan, China) |
| Secondary Antibody    |                  |          |                         |
| HRP labelled Antibody | Goat anti rabbit | 1:10000  | ABclonal (Wuhan, China) |

<sup>1</sup>GCLC, glutamate-cysteine ligase catalytic subunit; GSTA2, glutathione S-transferase alpha 2;

GSTA3, glutathione S-transferase alpha 3; HO1, heme Oxygenase-1; NQO1, NAD(P)H:quinone

oxidoreductase-1; NRF2, nuclear factor erythroid-2 related fa
